# Supplementary material for: Emerging Technologies to Promote Fans Interaction in Football Events: A Systematic Review
Source: Hindawi journal article supplement (doi:10.1155/2023/6667260), 2023-12-06
Supplement: f1 [file 6667260.f1.docx]

| **Supplementary file.** Inclusion and exclusion criteria of the scientific articles readed in full-text. | | | | |
| --- | --- | --- | --- | --- |
| Title | Authors | Year | Decision | Excluded why? |
| Sports fans and innovation: An analysis of football fans’ satisfaction with video assistant refereeing through social identity and argumentative theories | I. Tamir | 2019 | **EXCLUDED** | Video Assistant Referee |
| Real-time crowd density mapping using a novel sensory fusion model of infrared and visual systems | S. Yaseen, A. Al-Habaibeh, D. Su and F. Otham | 2013 | **EXCLUDED** | Ohter sportive event |
| Crowd-based semantic event detection and video annotation for sports videos | F. Sulser, I. Giangreco and H. Schuldt | 2014 | **EXCLUDED** | Video annotation |
| The digital productivity of football supporters: Formats, motivations and styles | A. C. Vimieiro | 2018 | **EXCLUDED** | media production projects |
| More decision-aid technology in sport? An analysis of football supporters’ perceptions on goal-line technology | M. Winand and C. Fergusson | 2016 | **EXCLUDED** | Goal Line Technology |
| Watch or Immerse? Redefining Your Role in Big Shows | V. Vasconcelos, M. Amazonas, T. Castro, R. Freitas, B. Gadelha and Acm | 2015 | **EXCLUDED** | Music concert environment |
| Whatsappsport: Using Whatsapp While Viewing Sports Events | I. Tamir | 2020 | **EXCLUDED** | Social Media - Whatsapp |
| Fan perception towards the usage of technology in football | N. Mm and N. Nimkar | 2020 | **EXCLUDED** | Fans' perception about technology |
| Banal Europeanism? Europeanisation of football and the enhabitation of a Europeanised football fandom | R. Weber | 2021 | **EXCLUDED** | Not about technology |
| Sports fans and innovation: An analysis of football fans’ satisfaction with video assistant refereeing through social identity and argumentative theories | M. Winand, C. Schneiders, S. Merten and M. Marlier | 2021 | **EXCLUDED** | Duplicated |
| The changing faces of fandom? Exploring emerging ‘online’ and ‘offline’ fandom spaces in the English Premier League | J. Woods and J. A. L. Ludvigsen | 2022 | **EXCLUDED** | Stadium fans' localization |
| The Representation of Data as an Informative and Brand-building Element in Sports Competitions: Technological Innovations in the Graphics of LaLiga Santander | J. L. Torres-Martín, A. Castro-Martínez and P. Díaz-Morilla | 2022 | **EXCLUDED** | Branding and Marketing |
| A big data analysis of Twitter data during premier league matches: do tweets contain information valuable for in-play forecasting of goals in football? | F. Wunderlich and D. Memmert | 2022 | **EXCLUDED** | Social Media - Twitter |
| The Globall Football Glossary® Application: Timeless product and legacy of the 2014 FIFA World Cup™ | N. Todt, C. Perna, H. Delgado, E. Pellanda, D. F. Furtadod and L. H. Rolim | 2019 | **INCLUDED** |  |
| The fans united will always be connected: Building a practical DTN in a football stadium | I. Wakeman, S. Naicken, J. Rimmer, D. Chalmers and C. Fisher | 2014 | **INCLUDED** |  |
| When noise becomes voice: designing interactive technology for crowd experiences through imitation and invention | R. Veerasawmy and J. McCarthy | 2014 | **INCLUDED** |  |
| Gambling-like Features in fan Tokens | H. Lopez-Gonzalez and M. D. Griffiths | 2023 | **EXCLUDED** | Fan Token Online Store |
| Impact of Mobile Apps on Building Customer Relationships and Financial Support for the Football Club: Findings from Ruch Chorzów | M. Szołtysik and A. Strzelecki | 2023 | **EXCLUDED** | Non Acessible |
| Theorizing surveillance and social spacing through football: The fan-opticon and beyond | M. Turner and J. A. Lee Ludvigsen | 2023 | **EXCLUDED** | Non technological aproach |
| Spectators of AI : Football Fans vs. the Semi-Automated Offside Technology at the 2022 FIFA World Cup | S. Viswanathan, R. Shankar, J. Jackson and R. Binns | 2023 | **INCLUDED** |  |
| Enhancing remote live sports experiences through an eyes-free interaction | P. Centieiro, T. Romão and A. E. Dias | 2013 | **INCLUDED** |  |
| Exploring the Use of Second Screen Devices During Live Sports Broadcasts to Promote Social Interaction | M. Cruz, T. Romao, P. Centieiro and A. E. Dias | 2017 | **INCLUDED** |  |
| Mobile communication and the sports industry: The case of 3G | R. Boyle | 2019 | **EXCLUDED** | Critical review |
| IT enhances football at world cup 2014 | I. Bojanova | 2014 | **EXCLUDED** | Review |
| A fog based ball tracking (FB2T) system using intelligent ball bees | A. E. Abulwafa, A. I. Saleh, H. A. Ali and M. S. Saraya | 2020 | **EXCLUDED** | Technique for tracking a soccer ball from mobile camreas fixed on multiple ball bees |
| Musical Messaging: The Social and Anti-Social Affordances of WhatsApp in the Football Culture of the Latin American Southern Cone | Achondo, L. | 2022 | **EXCLUDED** | social and anti-social potentialities of viral media and digital technologies (whatsapp) |
| Snapshots of Modernity: Reading Football Photographs of the 1930 World Cup in Uruguay | Acuña | 2019 | **EXCLUDED** | Messages associated to Images/Photographs related to soccer |
| Use of deep learning in soccer videos analysis: survey | S. Akan and S. Varlı | 2022 | **EXCLUDED** | Video analysis of soccer |
| Industrial football and public relations: Emotional attractiveness, reputation, and "Come To Beşiktaş" | Ö. U. Akbaş | 2019 | **EXCLUDED** | Analyzing what kinds of cultural, linguistic, emotional codes and types of attractiveness were used in a soccer campaign |
| Operations research transforms the scheduling of chilean soccer leagues and south American world cup qualifiers | . Alarcón, G. Durán, M. Guajardo, J. Miranda, H. Muñoz, L. Ramírez, et al. | 2017 | **EXCLUDED** | Scheduling of tournaments |
| ‘No to Modern Football’: The Digitized Amplification of Collaborative Glocalization among Extreme Fan Communities: An Abstract | D. Alton and S. R. O’Sullivan | 2020 | **EXCLUDED** | Branding during sports events |
| A MOBILE CROWDSOURCING SYSTEM FOR FOOTBALL MATCH LIVE VIDEO STREAMING | Iliev, G. | 2018 | **INCLUDED** |  |
| Game-day football visualization experience on dissimilar virtual reality platforms | Kalivarapu, V., Macallister, A., Hoover, M., Sridhar, S., Schlueter, J., Civitate, A., Thompkins, P., Smith, J., Hoyle, J., Oliver, J., Winer, E., Chernoff, G. | 2015 | **EXCLUDED** | Virtual reality |
| Active Fan Era In Terms Of Culture Industry: Social Media's Effect on Football Club-Fan Relationships | Kara, T., Aytekin, C. | 2014 | **EXCLUDED** | Social media |
| Short-term multiagent simulation-based prediction in mass gatherings decision support | Karbovskii, V., Andrey, K., Rybokonenko, D., Voloshin, D. | 2016 | **EXCLUDED** | mass gathering |
| Real-time 3-D replays bring fans closer to action | Myles, P. | 2014 | **EXCLUDED** | Not a scientific article |
| Saúde na Copa: The world's first application of participatory surveillance for a mass gathering at FIFA world cup 2014, Brazil | Neto, O. L., Dimech, G. S., Libel, M., de Souza, W. V., Cesse, E., Smolinski, M., Oliveira, W., Albuquerque, J. | 2017 | **INCLUDED** |  |
| Changing the game in Nigeria? Appropriating Internet and web 2.0 for sport communication | Ojo, T. | 2018 | **EXCLUDED** | Case study that evaluates the way in which a Nigerian club uses digital media to make information available. |
| Viewing the Game Textually: Online Consumption of Live Text Commentary as Alternate Spectatorship Among Nigerian Football Fans | Ojomo, O. W. Olomojobi, O. T. | 2021 | **INCLUDED** |  |
| Online soccer fandom: from social networking to gaming | Ortega, V. R. | 2019 | **EXCLUDED** | Descriptive article on how fans interact with digital media. |
| Football tracking data: a copula-based hidden Markov model for classification of tactics in football | Ötting, M. Karlis, D. | 2022 | **EXCLUDED** | It presents new software to collect data from players on the field. |
| The use of digital platforms as a loyalty mechanism for Generation Z: The case of Rio Ave F.C | Perez, F. Mena, R. | 2020 | **EXCLUDED** | Case study that aims to understand how the club can use digital platforms to retain fans |
| Heimdallr: A dataset for sport analysis | Riegler, M. Dang-Nguyen, D. T. Winther, B. Griwodz, C. Pogorelov, K. Halvorsen, P. | 2016 | **EXCLUDED** | Presents a new way of analyzing and capturing player movement (Datasef for sport analysis) |
| A computer vision based web application for tracking soccer players | Rodrigues, J Cardoso, P. J. S. Vilas, T. Silva, B. Rodrigues, P. Belguinha, A. Gomes, C. | 2014 | **INCLUDED** |  |
| Design Opportunities for Digital Men's Health: An Exploratory Study Focusing on Football Fandom | Rooksby, J. Cecchinato, M. E. Asadzadeh, P. Philpott, M. Bunn, C. Acm, | 2020 | **EXCLUDED** | Study on the perception of fans, and presents ideas that can be followed to create technologies. |
| RISTI - Revista Iberica de Sistemas e Tecnologias de Informacao | Ruíz, E. Galarza, F. P. Altamirano-Benítez, V. | 2021 | **EXCLUDED** | Study on how clubs generate their online communication and the strategies used. |
| FSC-Set: Counting, Localization of Football Supporters Crowd in the Stadiums | O. Elharrouss, N. Almaadeed, K. Abualsaud, S. Al-Maadeed, A. Al-Ali and A. Mohamed | 2022 | **EXCLUDED** | Conference |
| Do Football Consumers Care About Sport Governance? An Analysis of Social Media Responses to the Recent FIFA Scandal | M. Hölzen and H. E. Meier | 2019 | **EXCLUDED** | social media |
| Engaging Australian Rules Football fans with social media: A case study | Hopkins | 2013 | **EXCLUDED** | Language |
| Shifting patterns of football fandom and digital media cultures: YouTube, Fifa videogames, and AFC Wimbledon | A. Hinck | 2018 | **EXCLUDED** | Social Media |
| Modeling dynamic coupling in social interactions | M. T. Fairhurst | 2020 | **EXCLUDED** | out of context |
| Understanding Sporting Social Media Brand Communities, Place and Social Capital: A Netnography of Football Fans | A. Fenton, B. J. Keegan and K. D. Parry | 2023 | **EXCLUDED** | Branding and Marketing |
| On the influence of individual characteristics and personality traits on the user experience with multi-sensorial media: an experimental insight | I. Galloso, J. F. Palacios, C. Feijóo and A. Santamaría | 2016 | **EXCLUDED** | non digital tool |
| Traditional and mediatized soccer fanship: the case of Indonesian Juventus’ supporters | Ferrari | 2019 | **EXCLUDED** | Branding and Marketing |
| The role of the brand in perceived service performance: Moderating effects and configurational approach in professional football | F. Calabuig, V. Prado-Gascó, J. Núñez-Pomar and J. Crespo-Hervás | 2021 | **EXCLUDED** | Branding and Marketing |
| America’s major league soccer: artificial intelligence and the quest to become a world class league | M. Das and S. Myrden | 2021 | **EXCLUDED** | Branding and Marketing |
| Sports marketing and perceived value: An application of the conjoint analysis in the fan membership programs of football | P. De Souza Dias and P. R. R. Monteiro | 2020 | **EXCLUDED** | Branding and Marketing |
| What Drives Our Emotions When We Watch Sporting Events? Ans ESM Study on the Affective Experience of German Spectators During the 2018 FIFA World Cup | Gotz, F., Stieger, S., Ebert, T., Rentfrow, J., Lewetz, D. | 2020 | **INCLUDED** |  |
